# Supplementary material for: Latest Comprehensive Medical Resource Consumption in Robot-Assisted versus Laparoscopic and Traditional Open Radical Prostatectomy: A Nationwide Population-Based Cohort Study
Source: MDPI journal article supplement (doi:10.3390/cancers13071564), 2021-03-29
Supplement: s1 [file s1]

Supplemental Figure 1 Bar graph of generalized linear mixed model of medical reimbursement for urinary diseases or surgical complications stratified by open, laparoscopic, and robotic RP

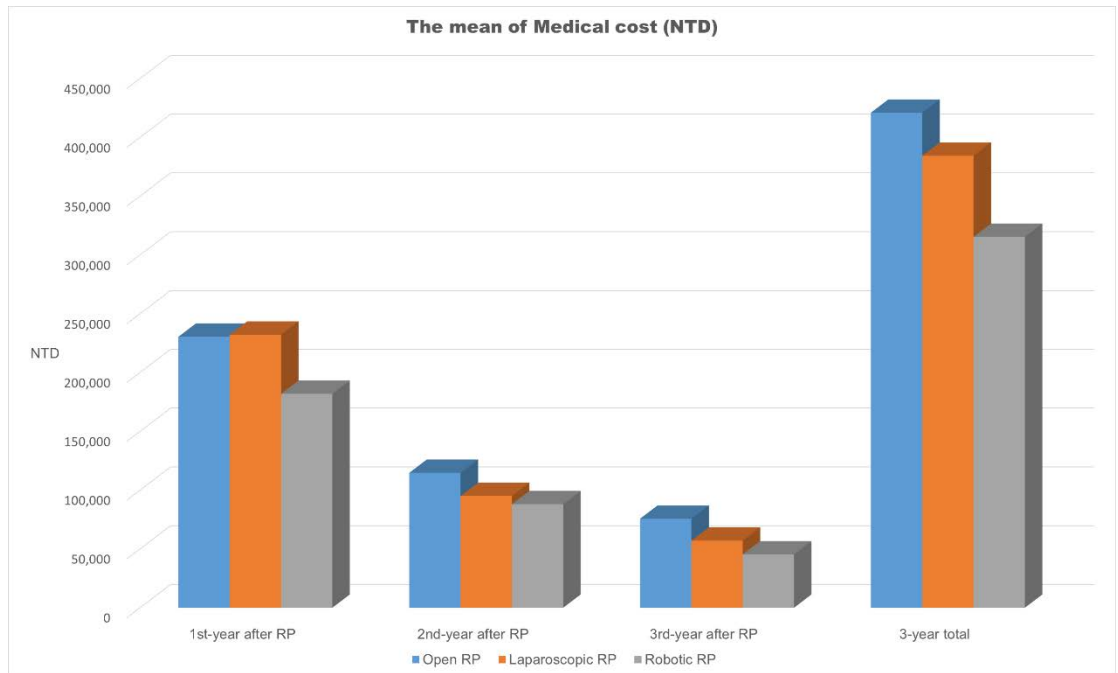

RP, radical prostatectomy; NTD, New Taiwan Dollars
